# Supplementary material for: Targeted sensors for glutamatergic neurotransmission
Source: eLife journal article supplement (doi:10.7554/elife.84029), 2023-01-09

A

0.5 mM  $\text{Ca}^{2+}$ 2 mM  $\text{Ca}^{2+}$ 4 mM  $\text{Ca}^{2+}$ 

iGluSnFR (95155)  
with wrong  $N$   
( $N = 4$ )

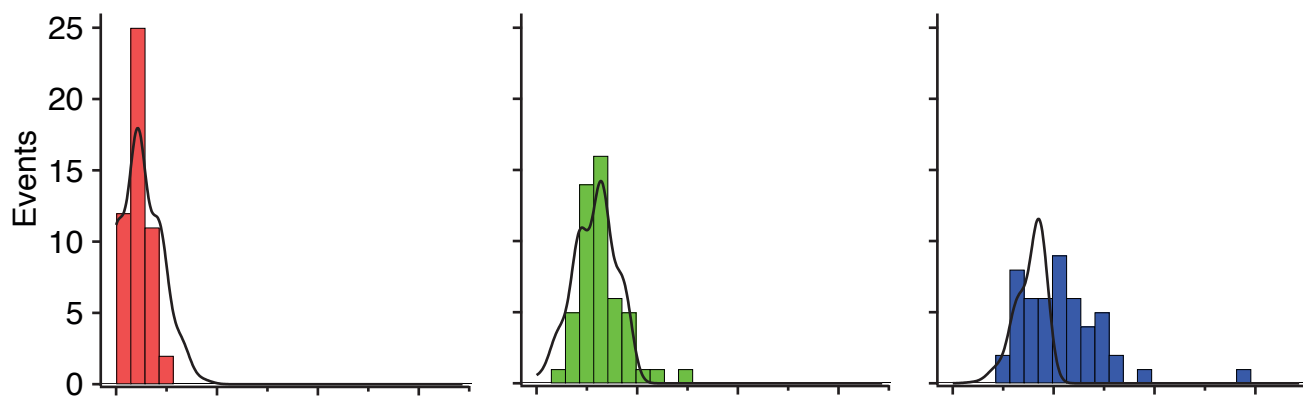

B

iGluSnFR (95155)  
with Poisson fit

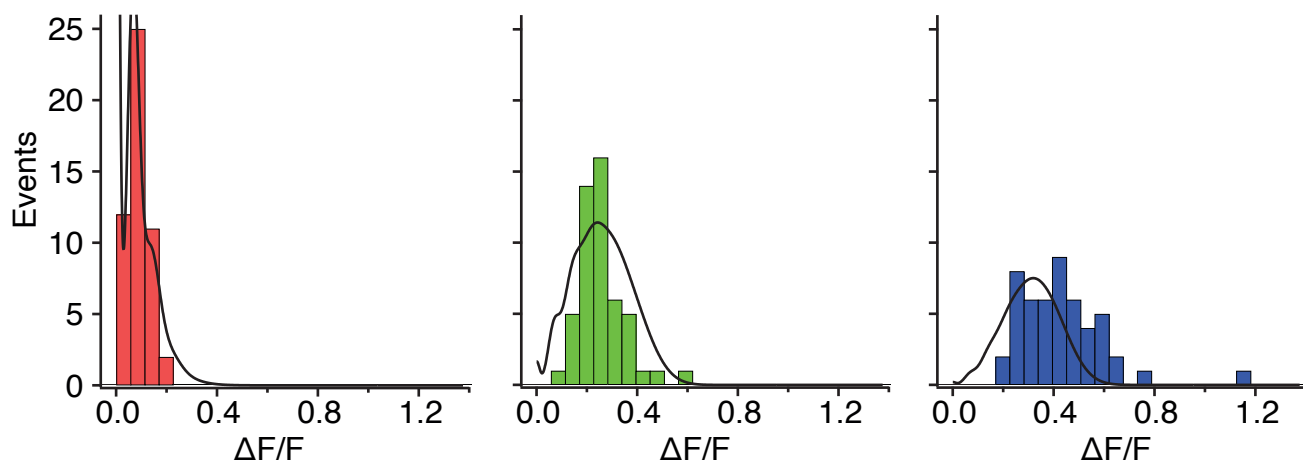

C

SnFR- $\gamma$ 2 (62948)  
with wrong  $N$   
( $N = 4$ )

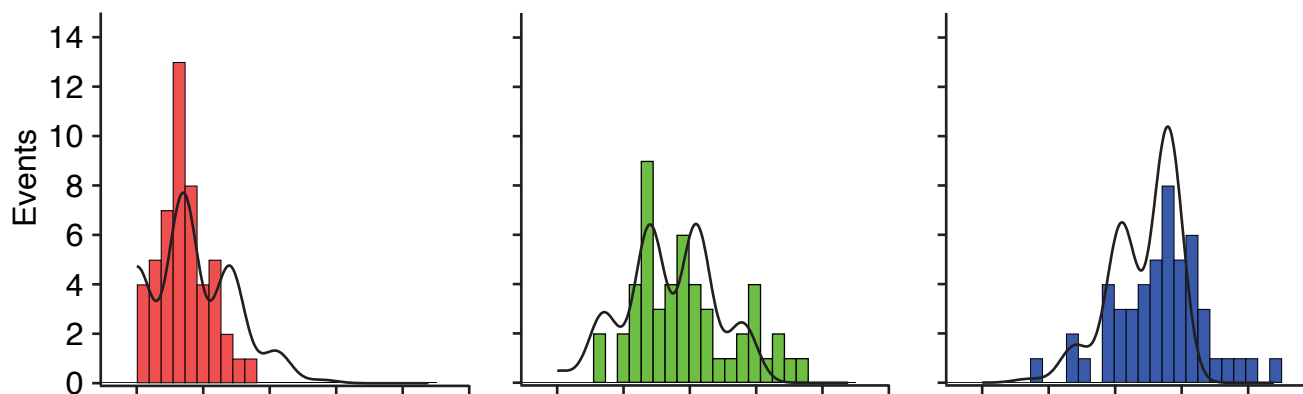

D

SnFR- $\gamma$ 2 (62948)  
with Poisson fit

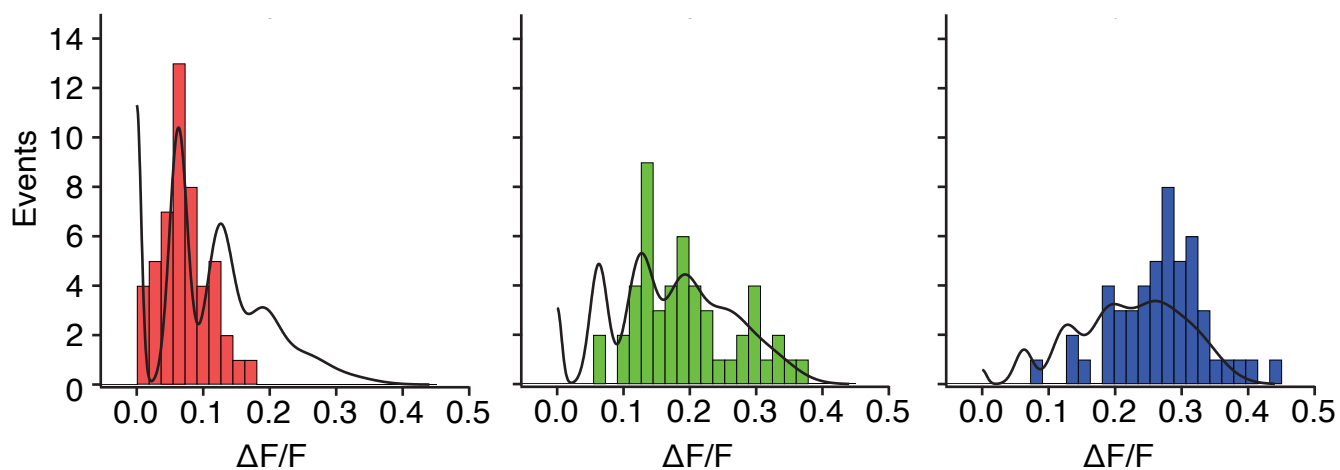

Supplement: supp [file elife-84029-supp-v1.zip]
