# Supplementary figures and images for: Targeted sensors for glutamatergic neurotransmission
Source: eLife journal article supplement (doi:10.7554/elife.84029), 2023-01-09

A

iGluSnFR

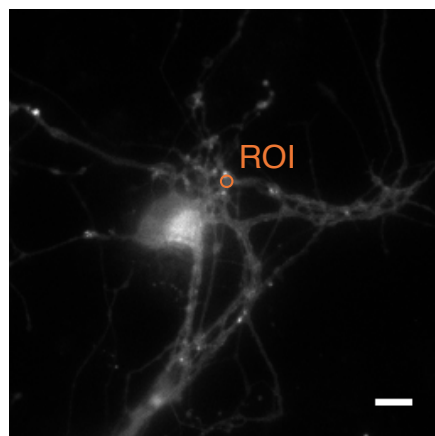

D

synapto-pHluorin

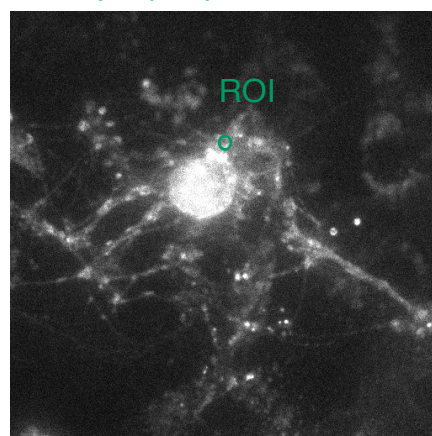

G

iGluSnFR Y230F

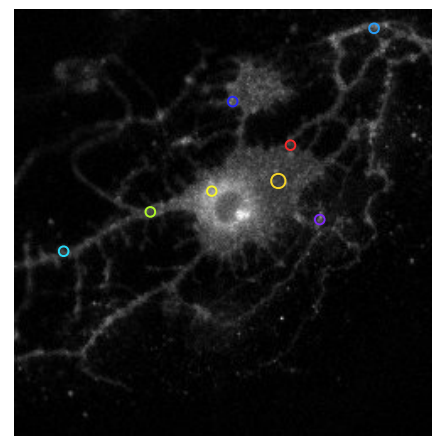

J

iGluSnFR Y230F

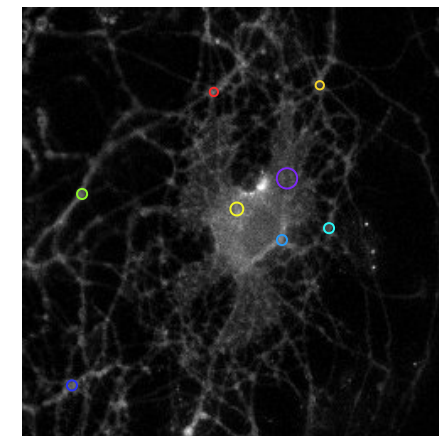

B

Stimulation

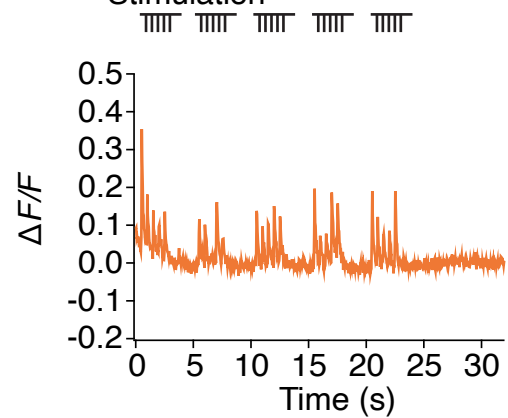

E

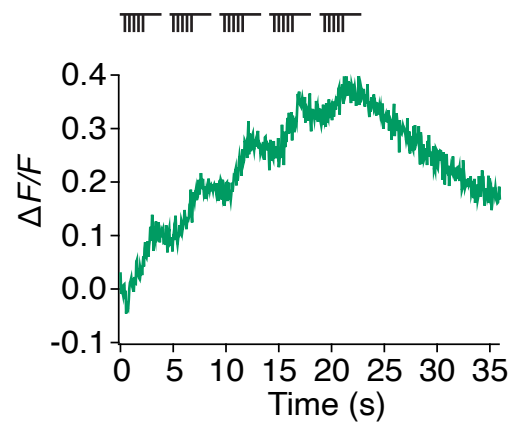

H

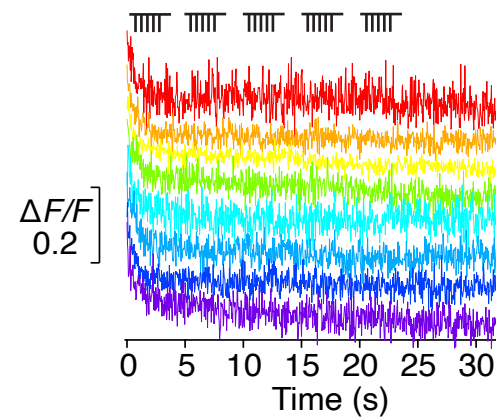

K

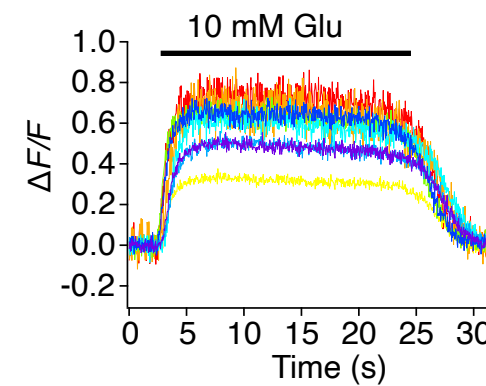

C

Stimulation

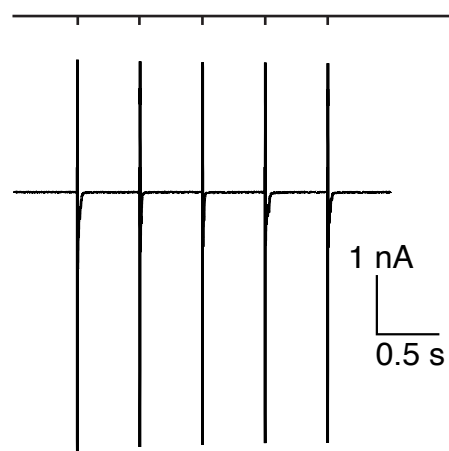

F

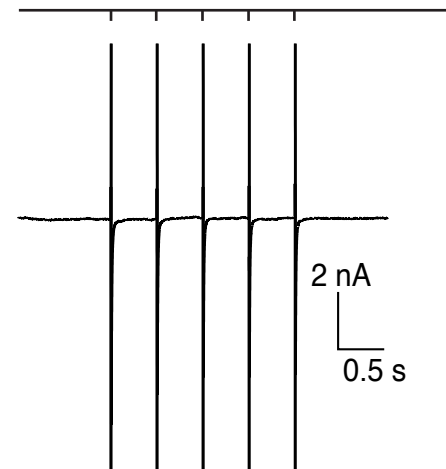

I

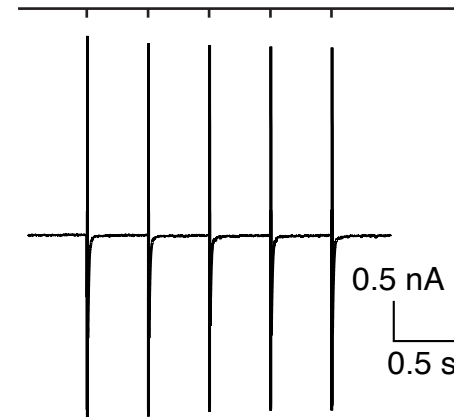

Supplement: supp [file elife-84029-supp-v1.zip]

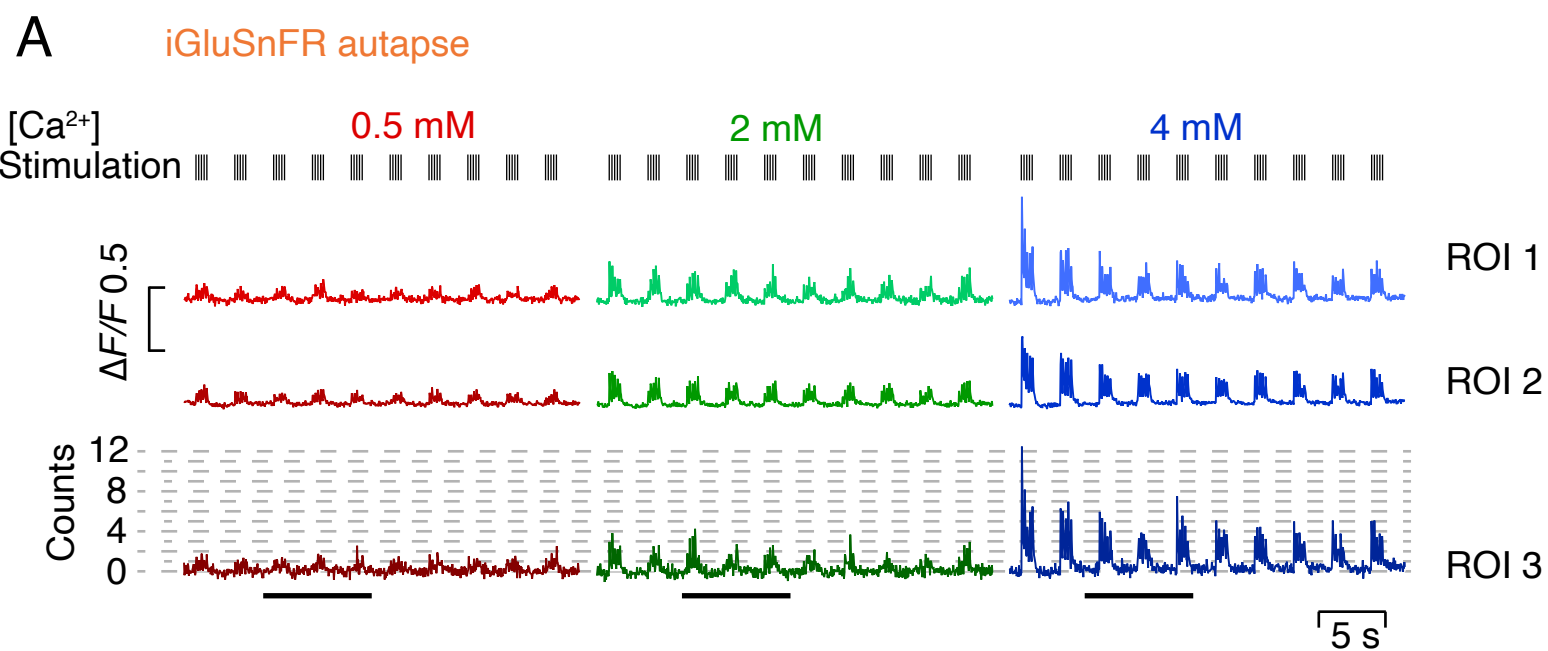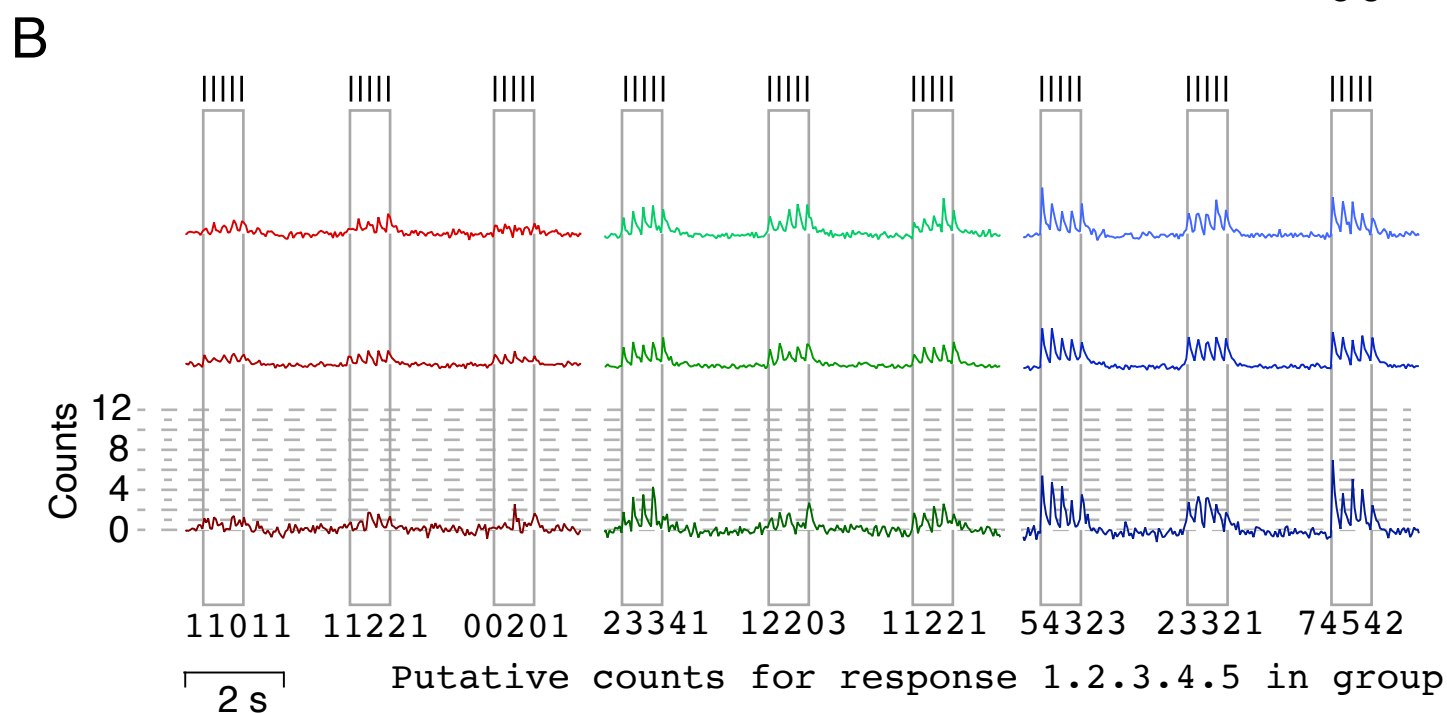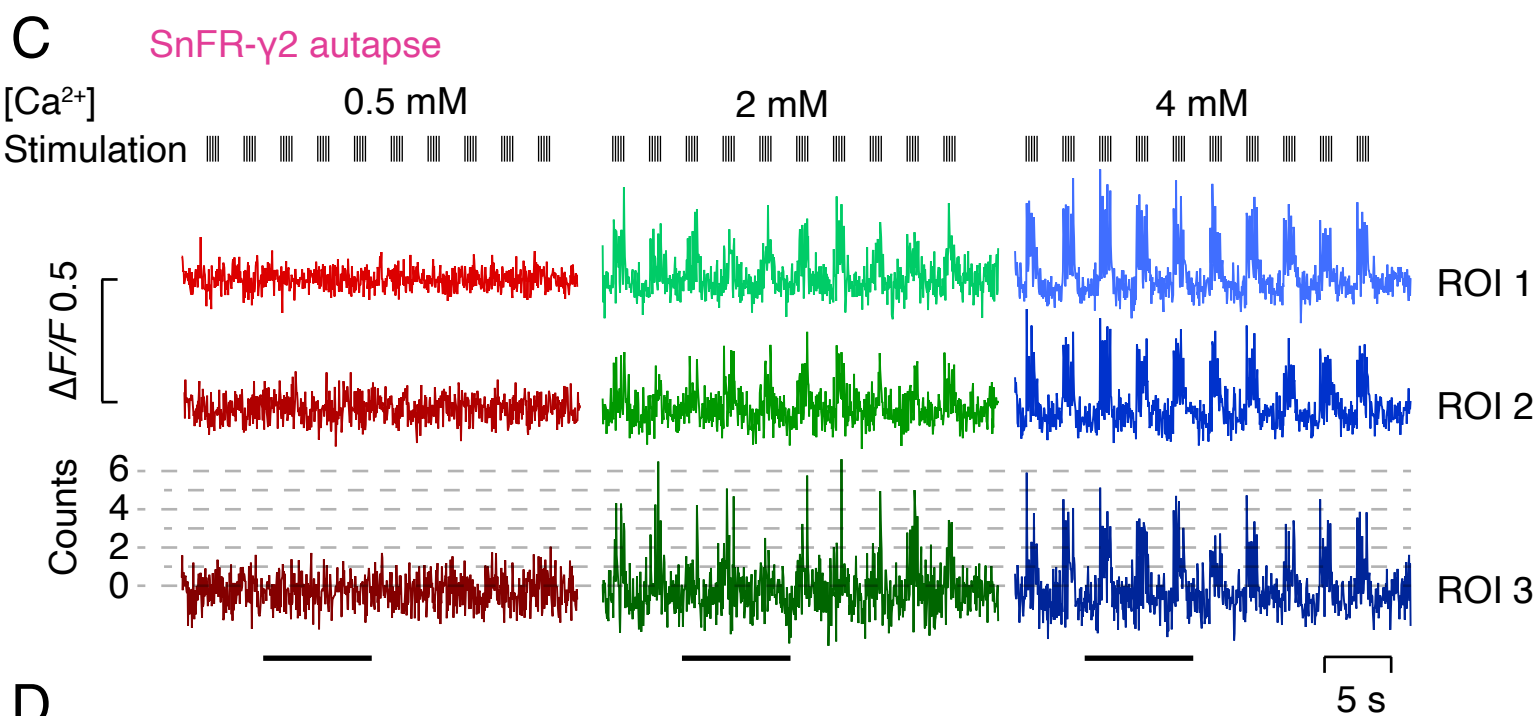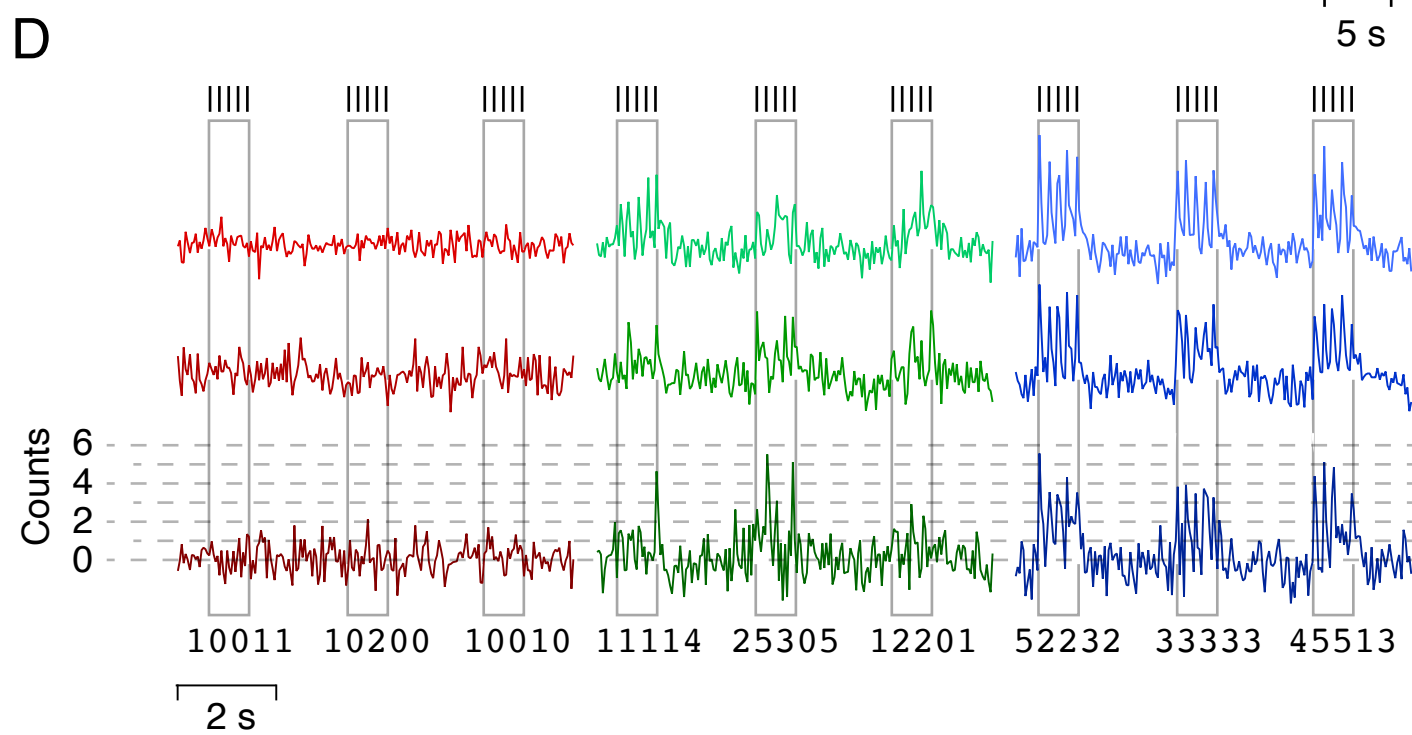

Supplement: supp [file elife-84029-supp-v1.zip]

## ImageJ Script

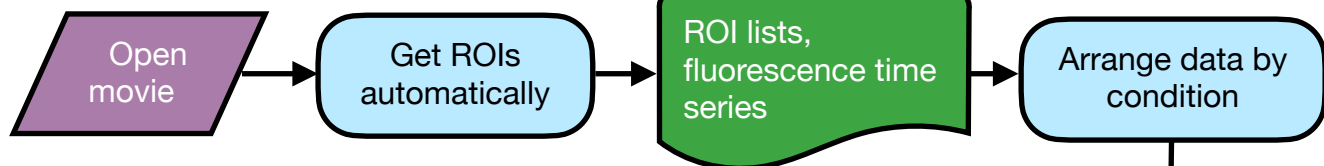

## SAFT workflow

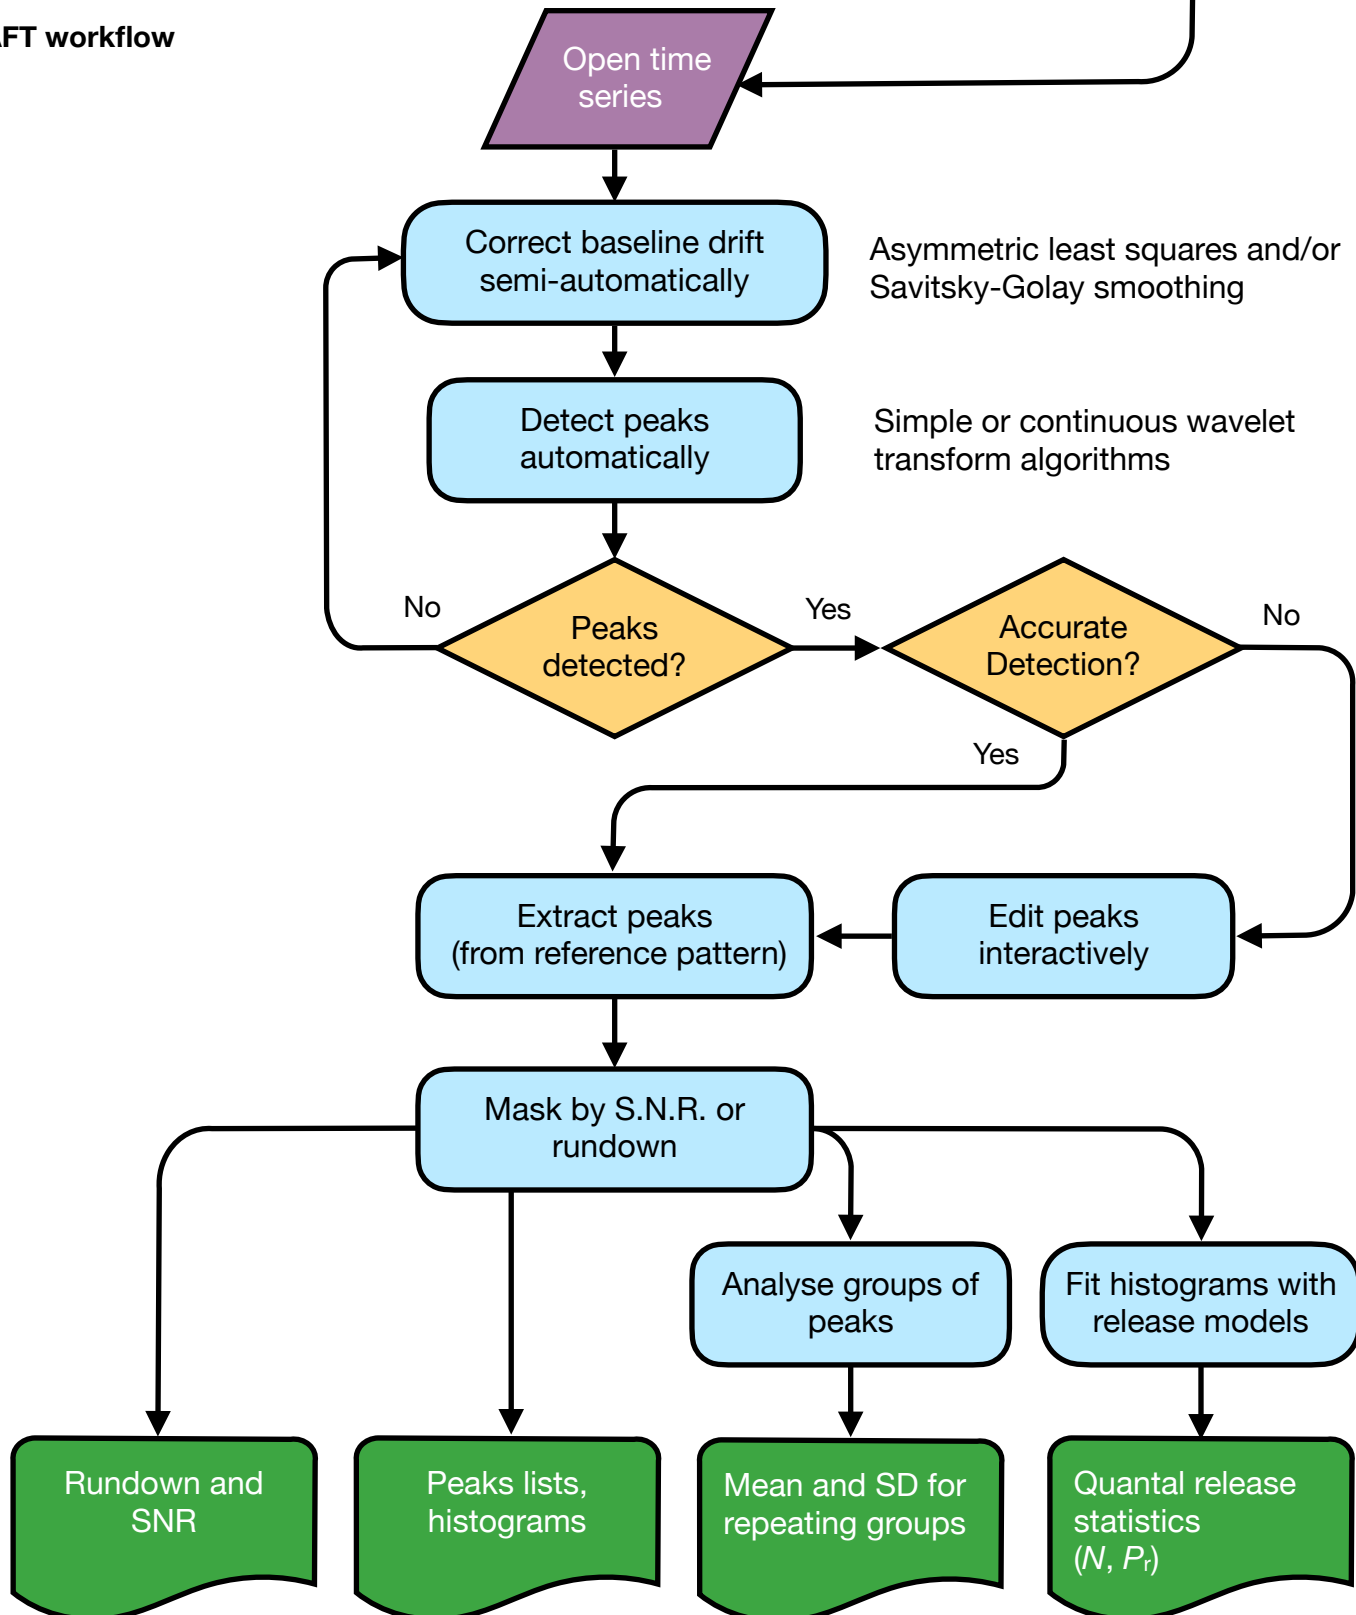

Supplement: supp [file elife-84029-supp-v1.zip]

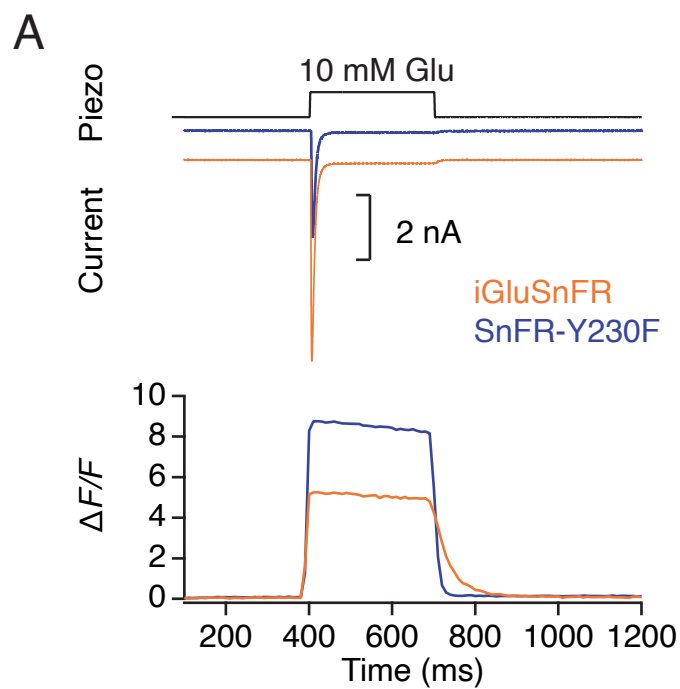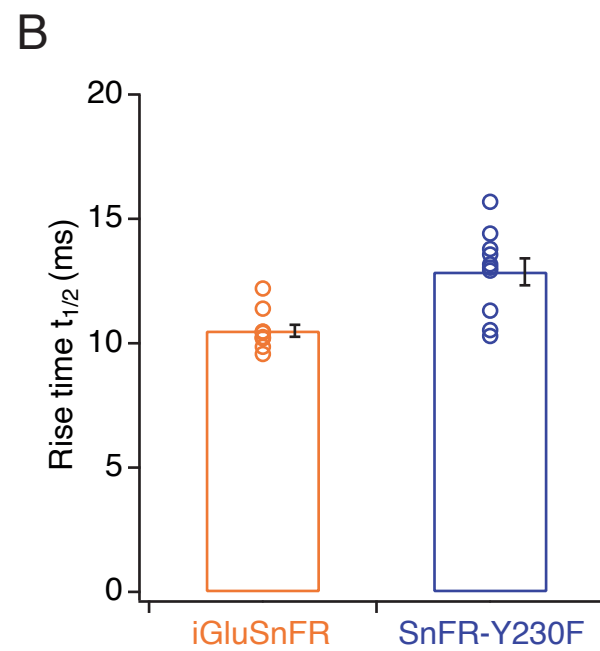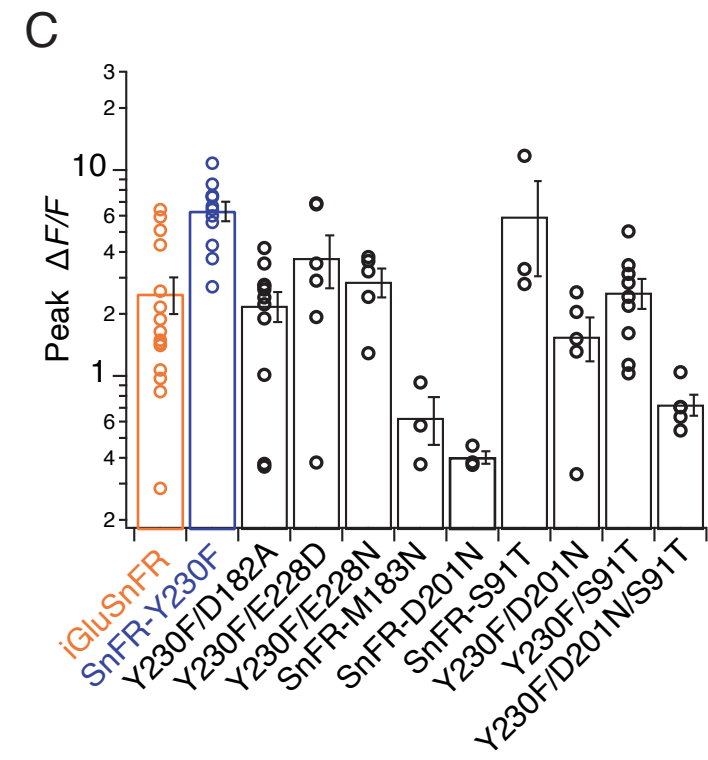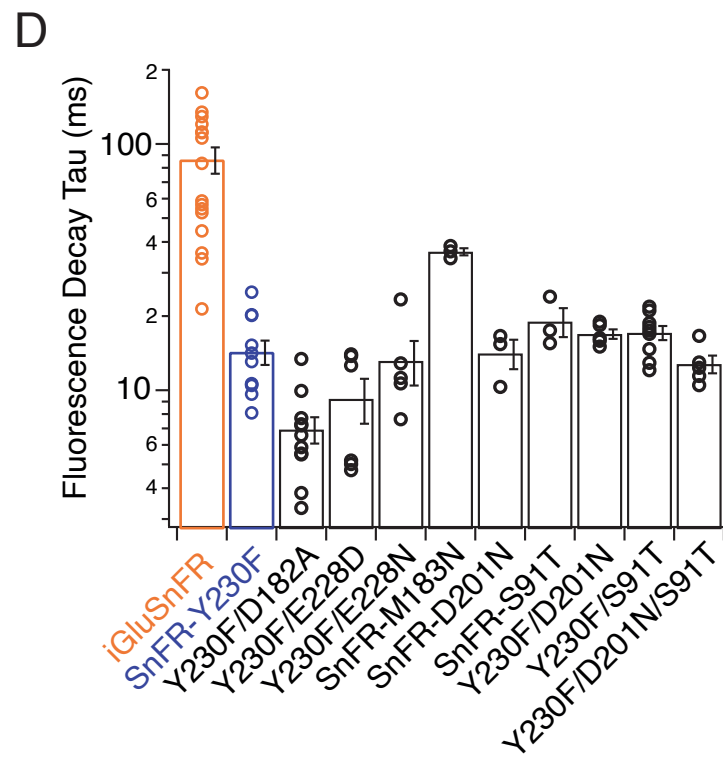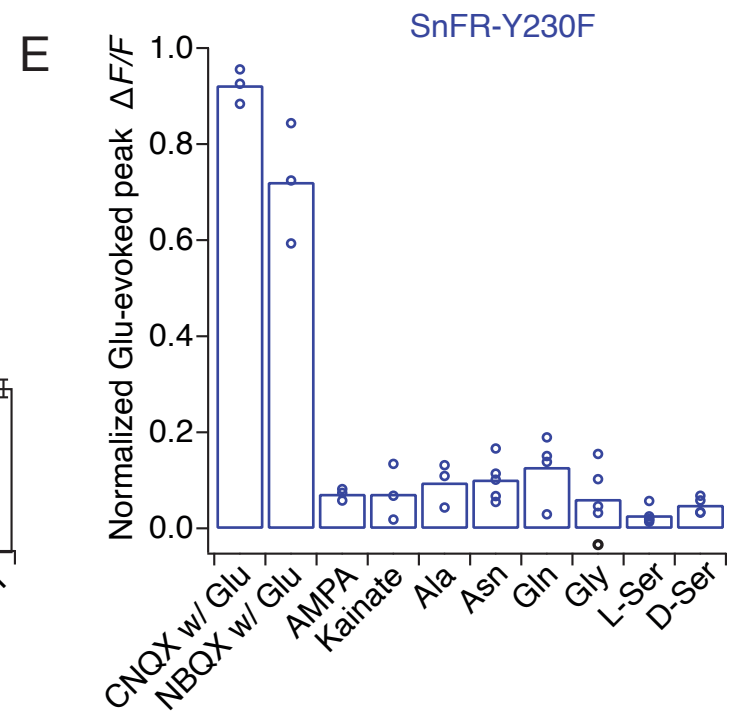

Supplement: supp [file elife-84029-supp-v1.zip]

A

Rundown: baseline fluorescence intensity ( $F_0$ )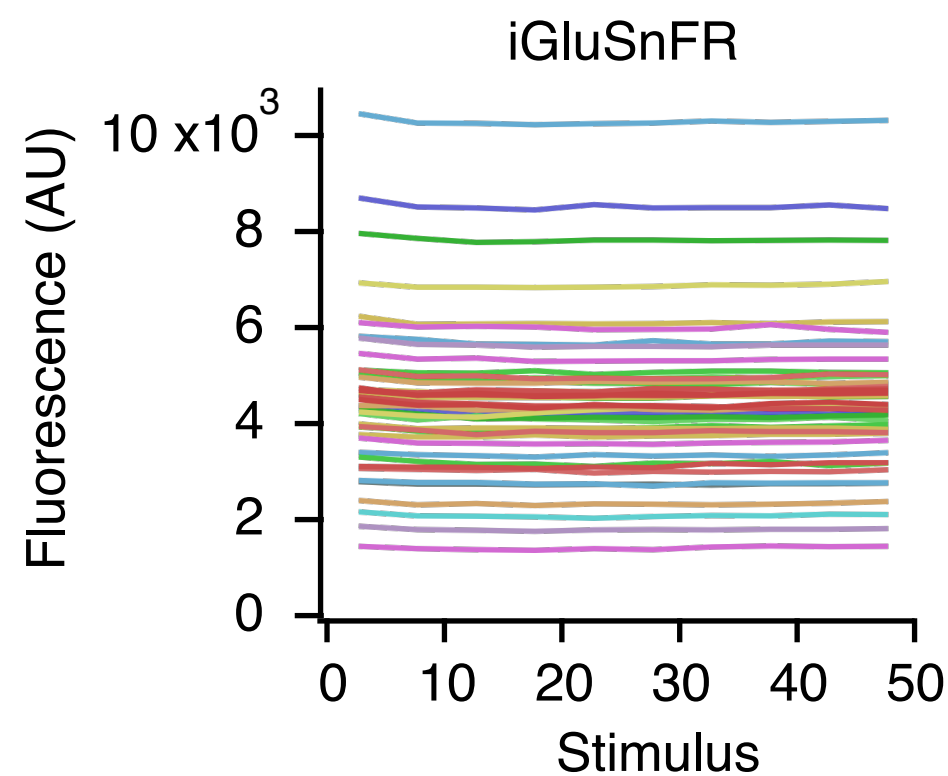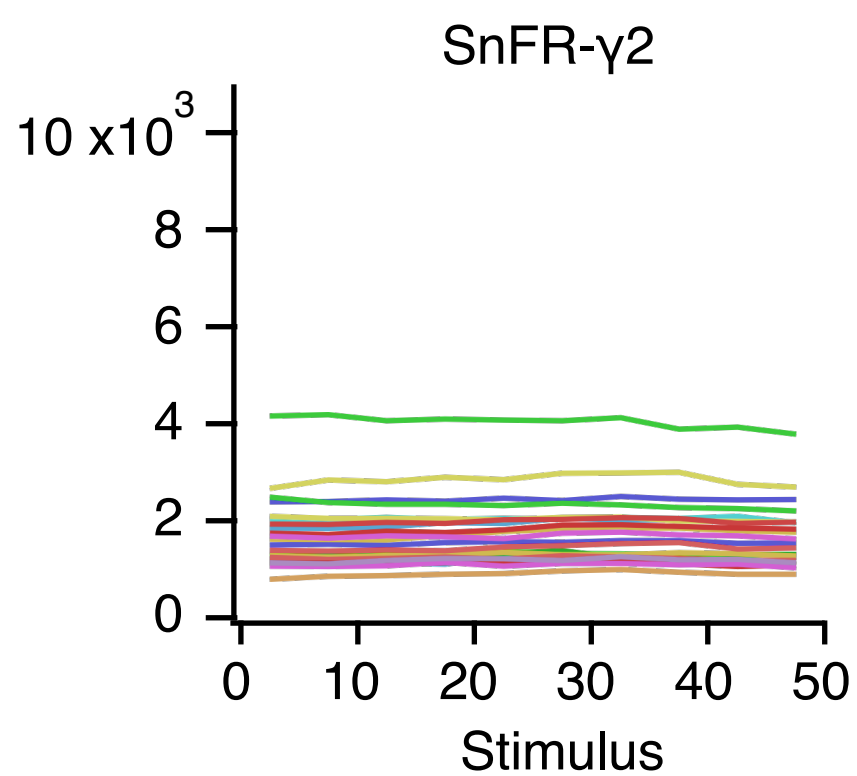

B

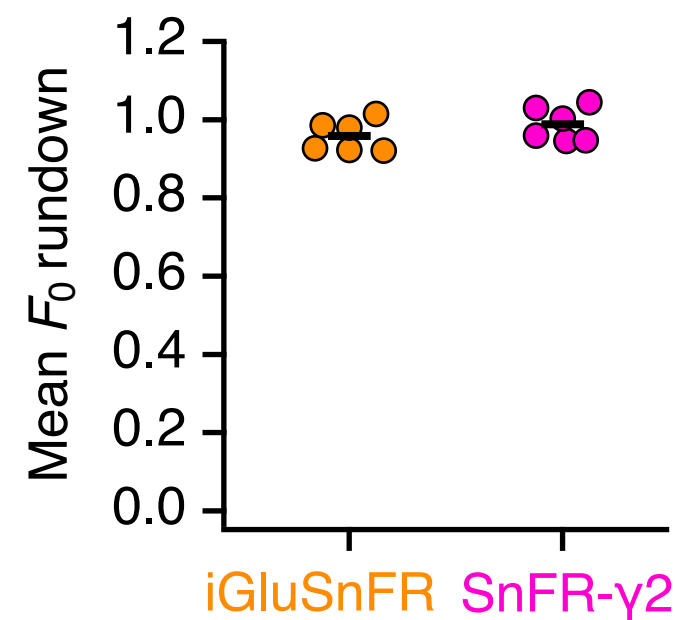

C

Rundown : EPSC

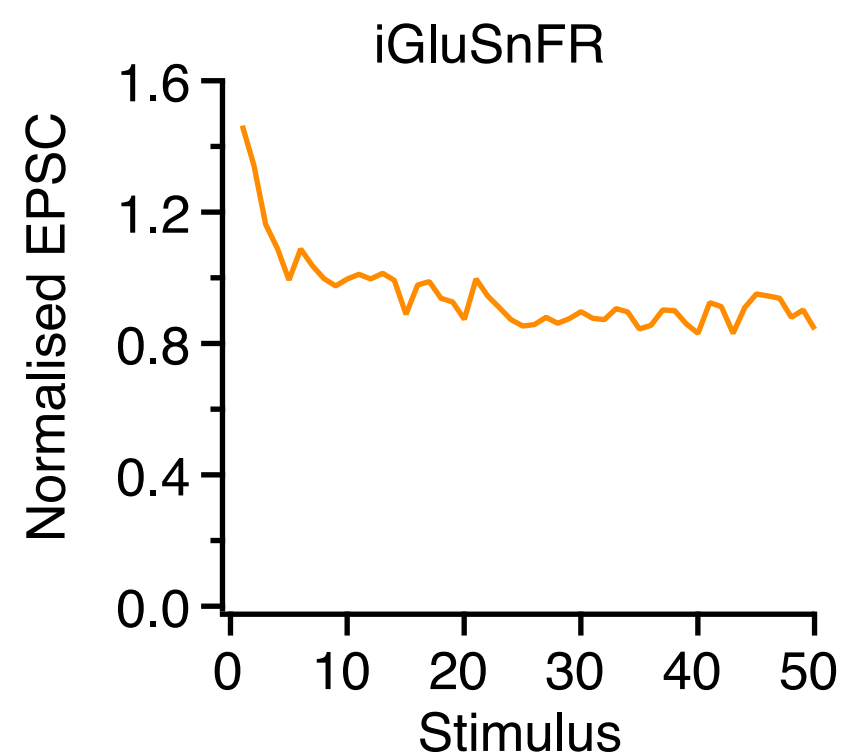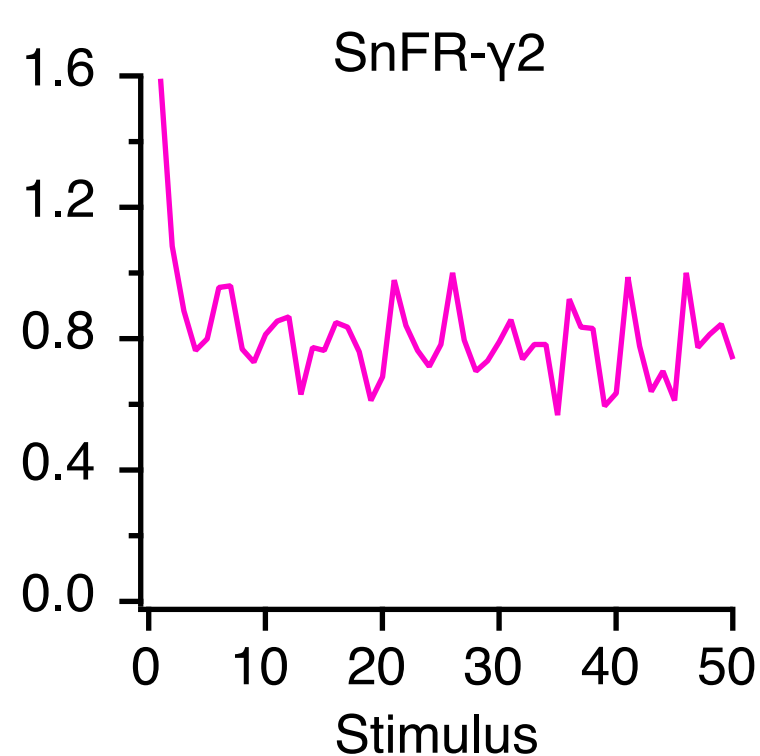

D

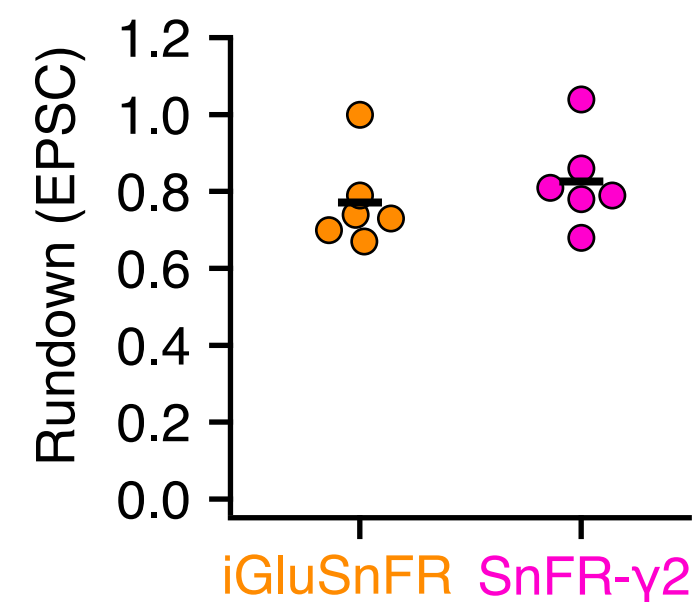

E

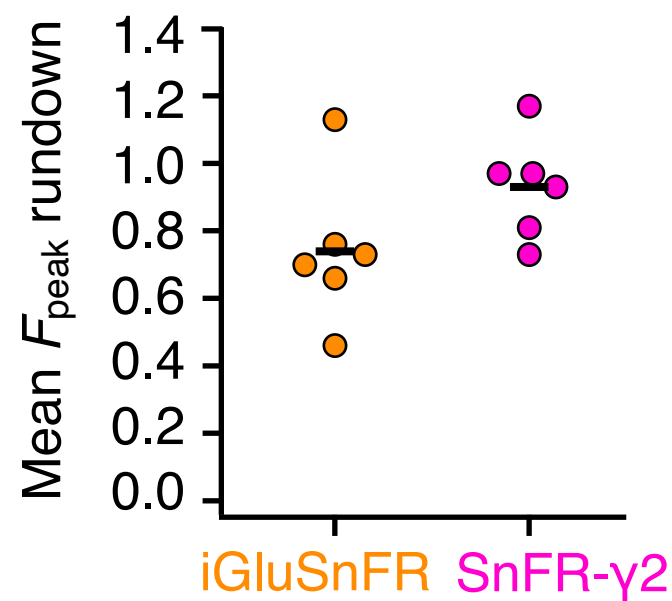

F

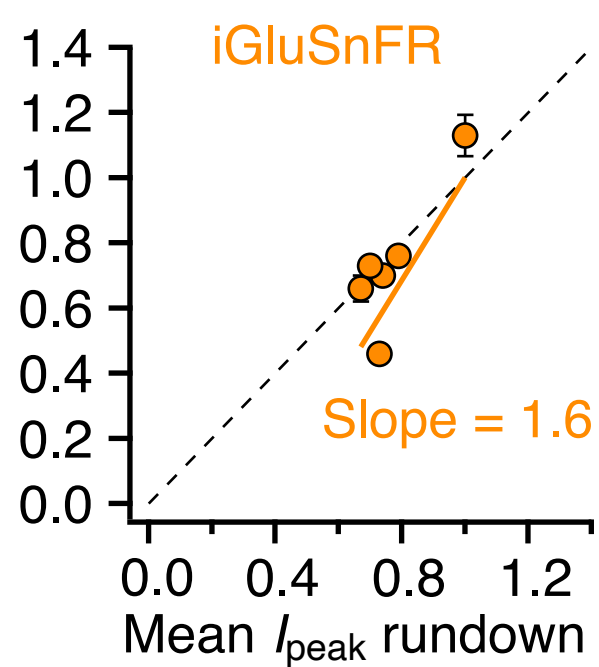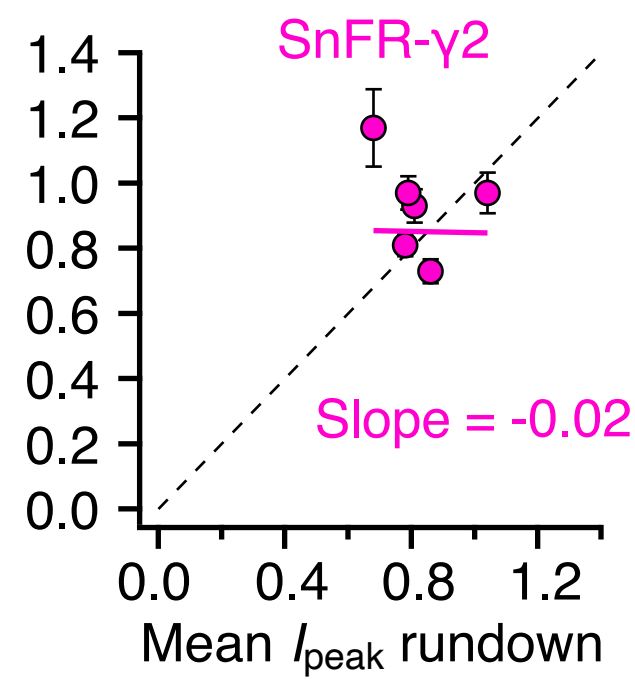

G

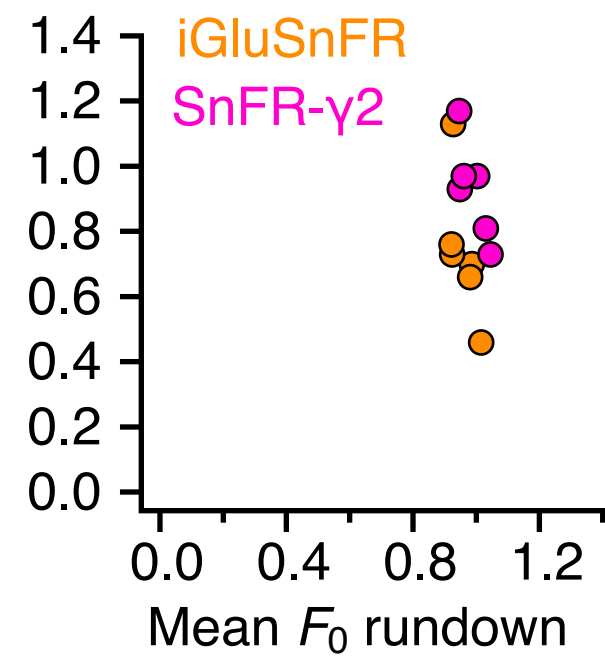

Supplement: supp [file elife-84029-supp-v1.zip]

A

iGluSnFR  
(45 ROIs plotted)

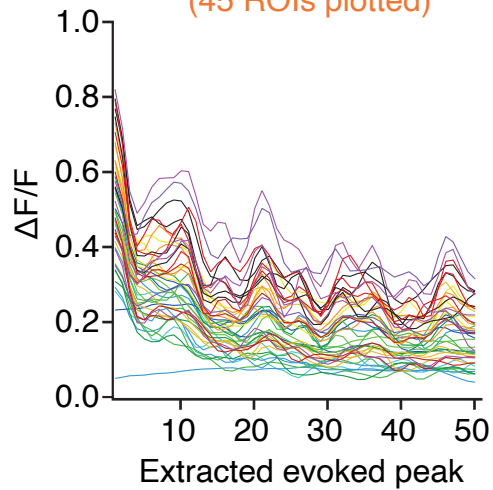

SnFR- $\gamma 2$   
(22 ROIs plotted)

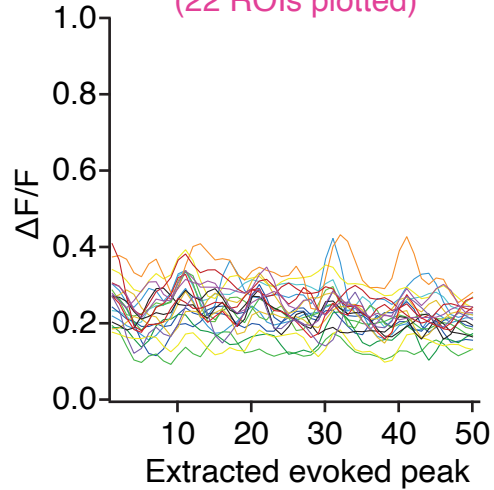

B

Fraction of ROIs without rundown

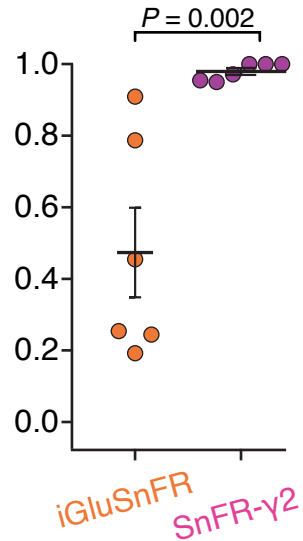

C

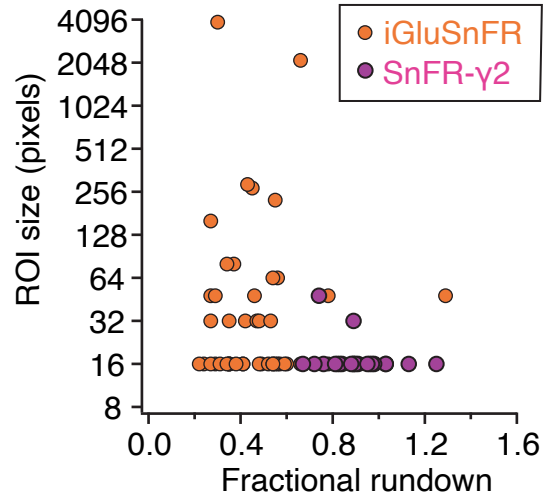

Supplement: supp [file elife-84029-supp-v1.zip]

A

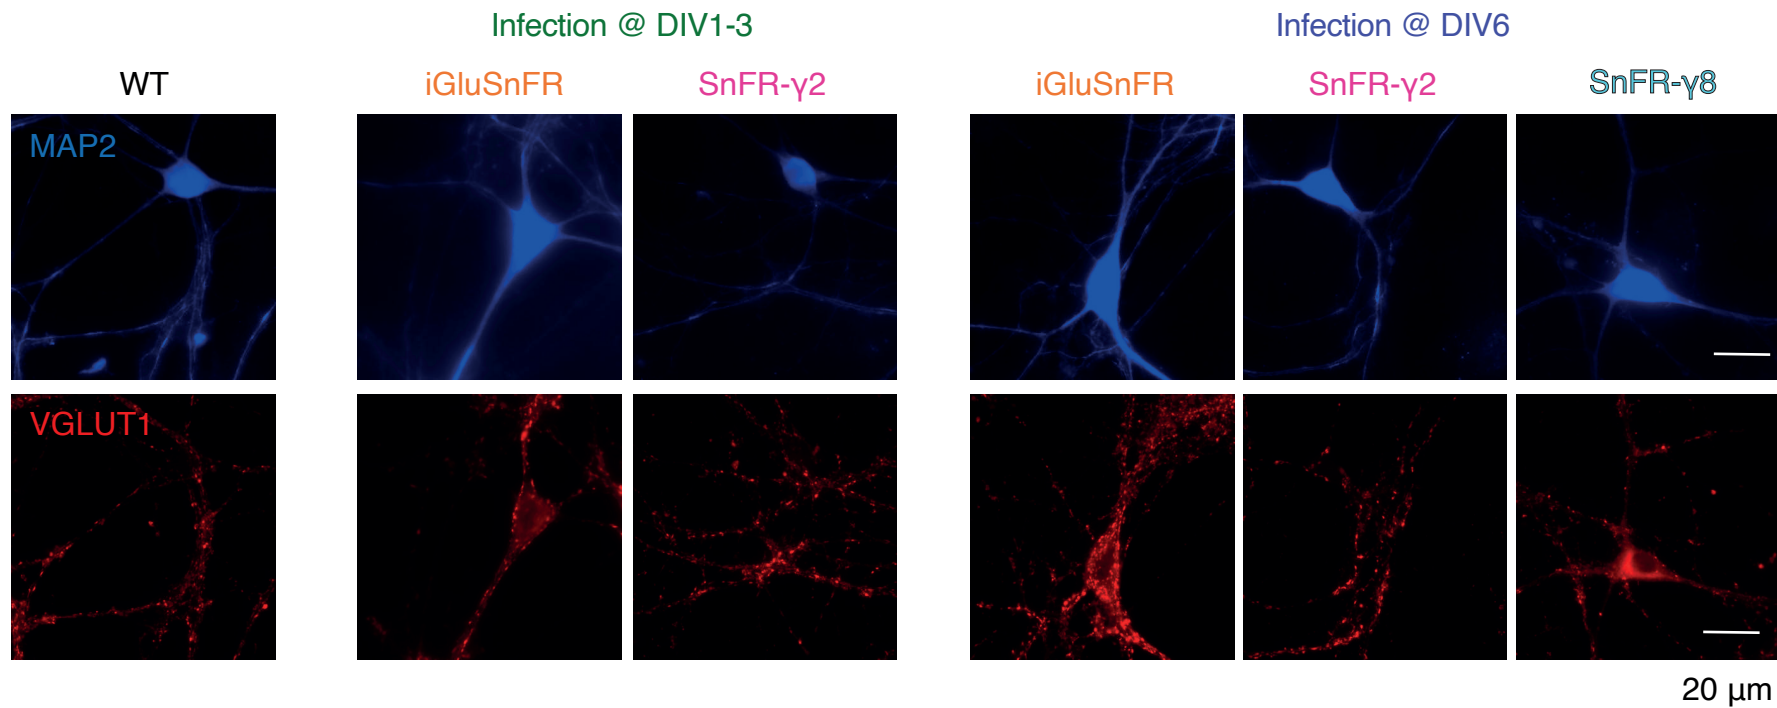

B

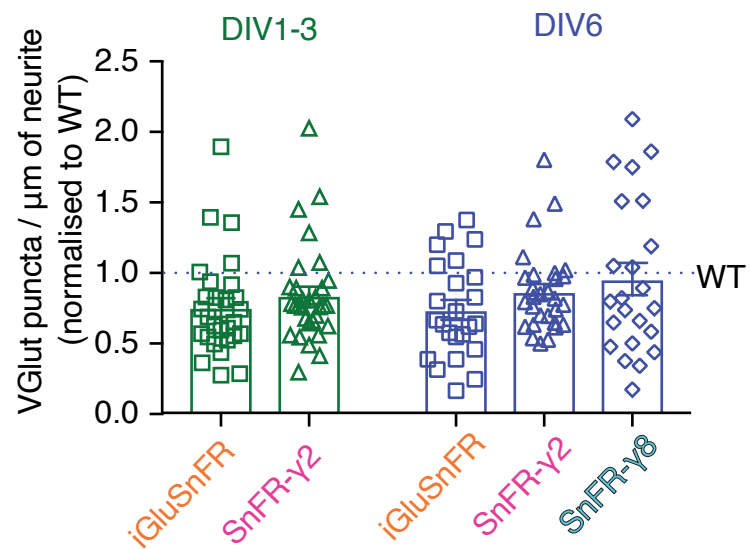

C

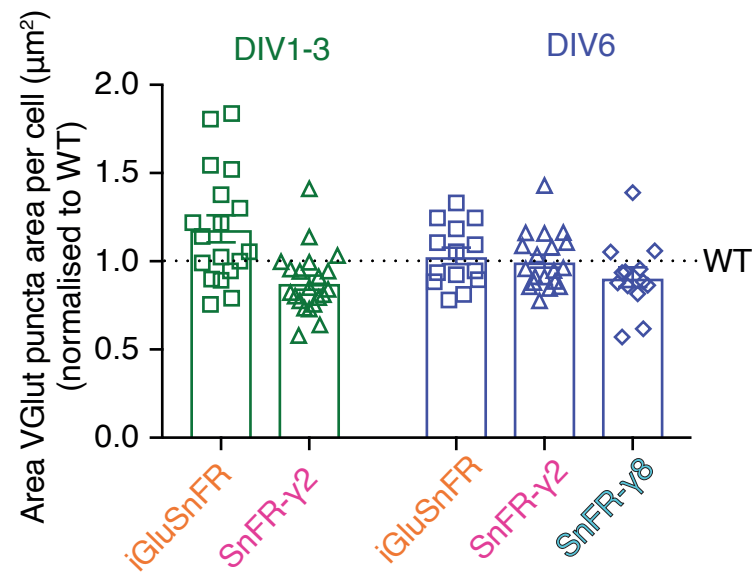

Supplement: supp [file elife-84029-supp-v1.zip]

**A**

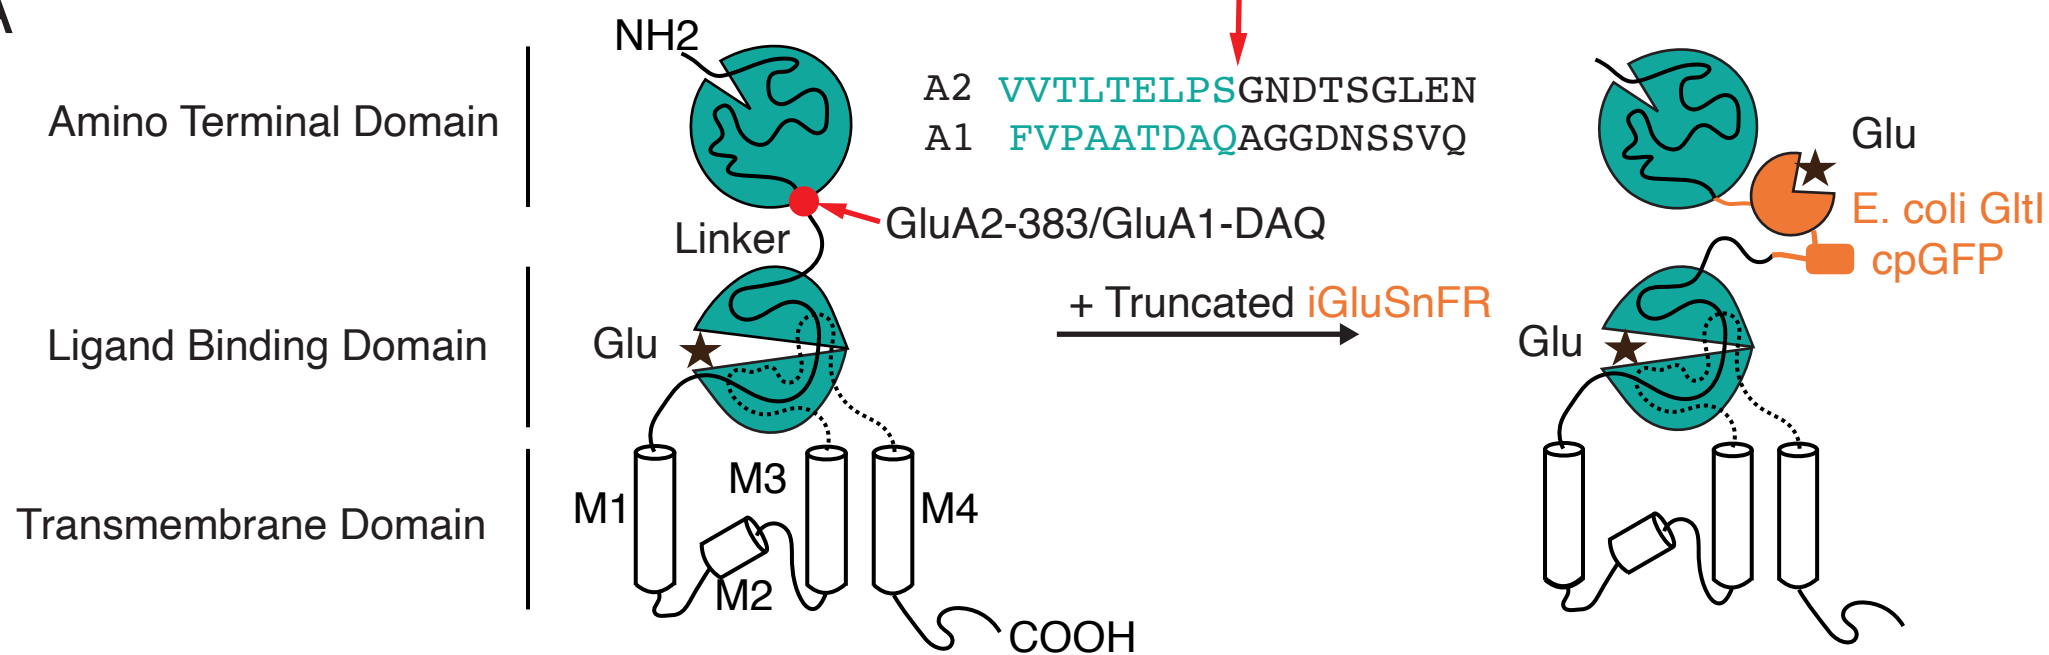

**B**

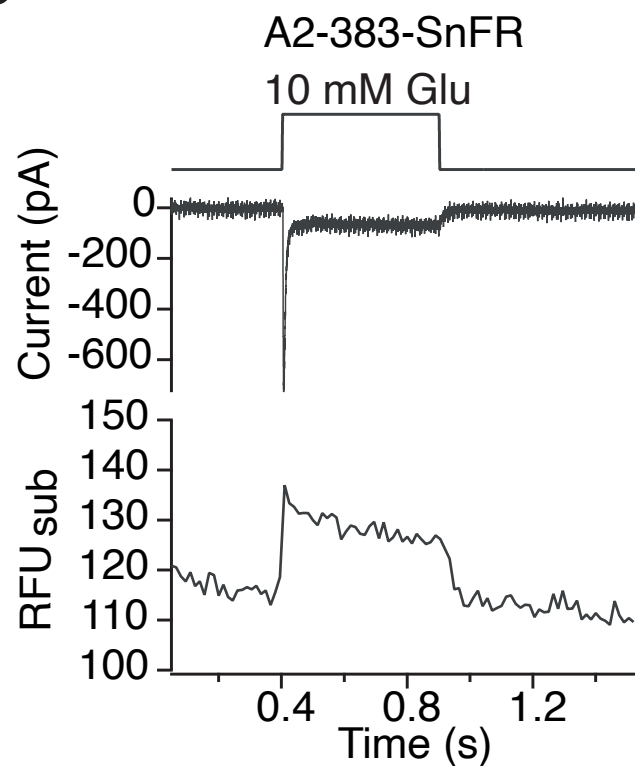

**C**

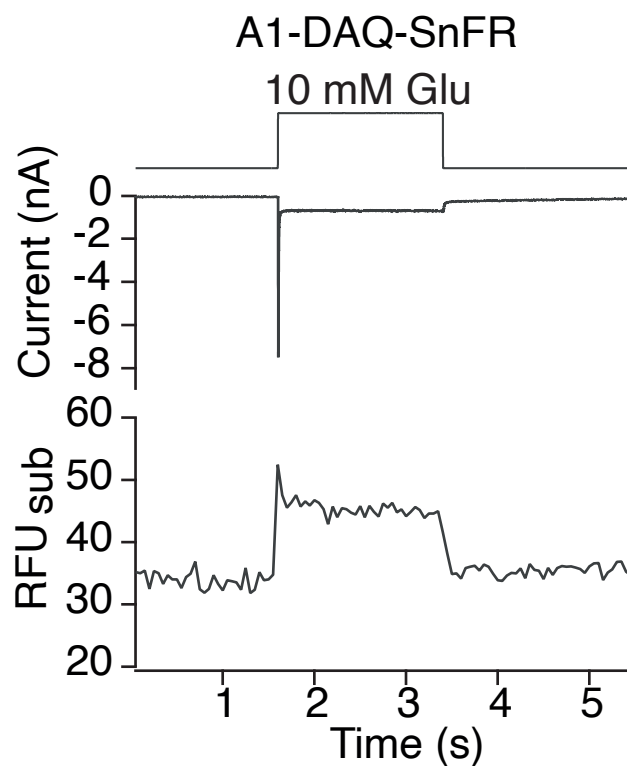

**D**

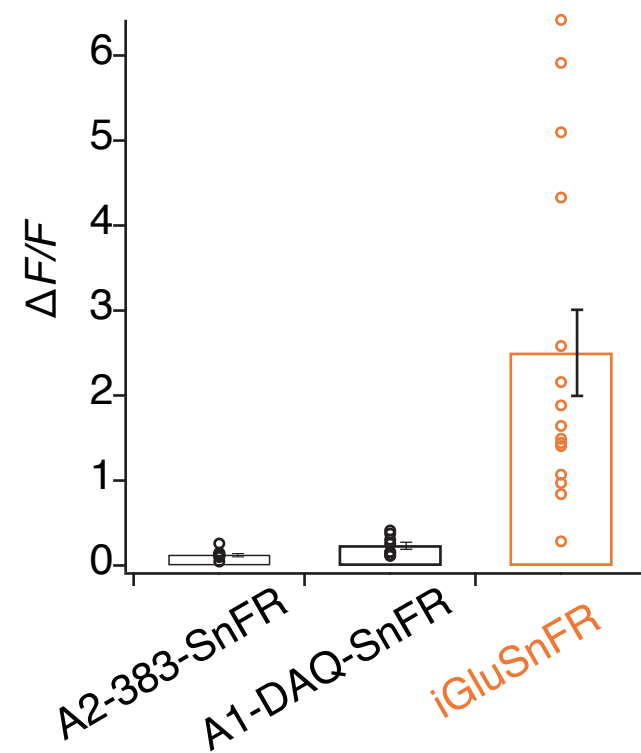

Supplement: supp [file elife-84029-supp-v1.zip]
